# Supplementary material for: An intriguing hydrogen bond arrangement of polymeric 1D chains of 4,4′-bipyridine coordinated to Co2+, Ni2+, Cu2+ and Zn2+ ions having barbiturate as counterions in a 3D network
Source: Royal Society of Chemistry journal article supplement (doi:10.1039/b819693a), 2009-01-01
Supplement: b819693a.pdf [file b819693a.pdf]

**Supplementary Material**

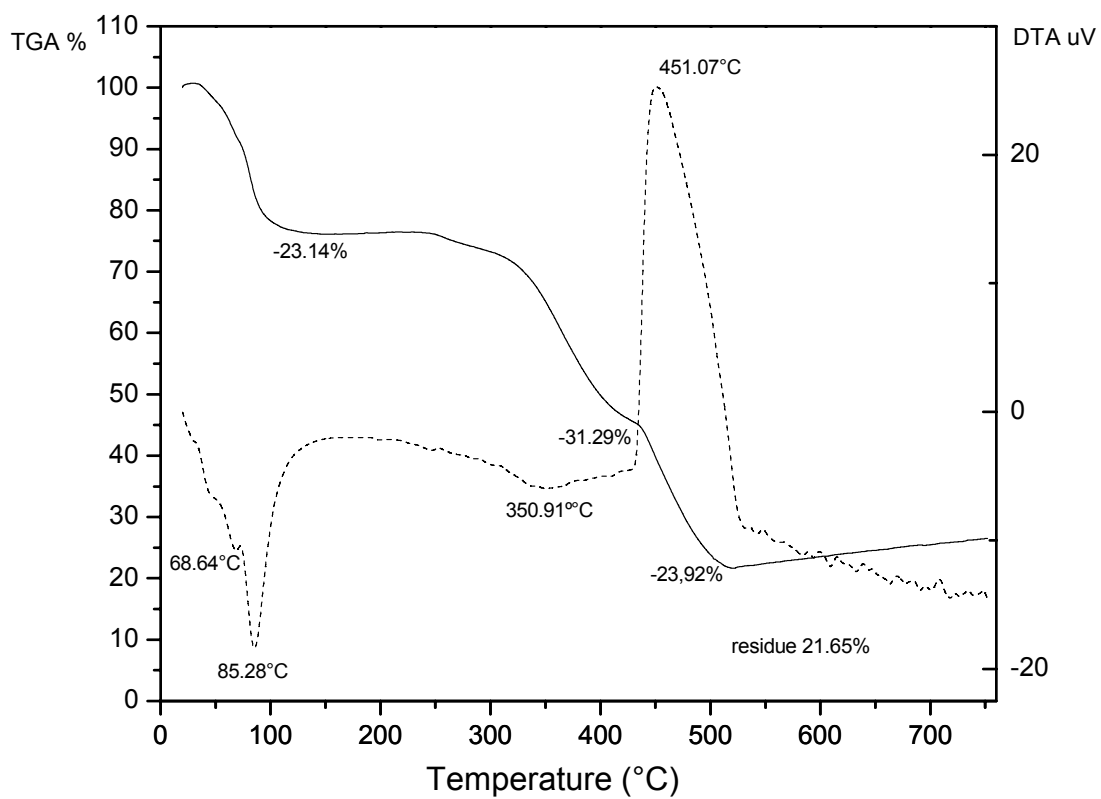

**Figure S1.** TGA and DTA curves for  $\text{CoB}_2\text{Bipy}\cdot 10\text{H}_2\text{O}$  complex.

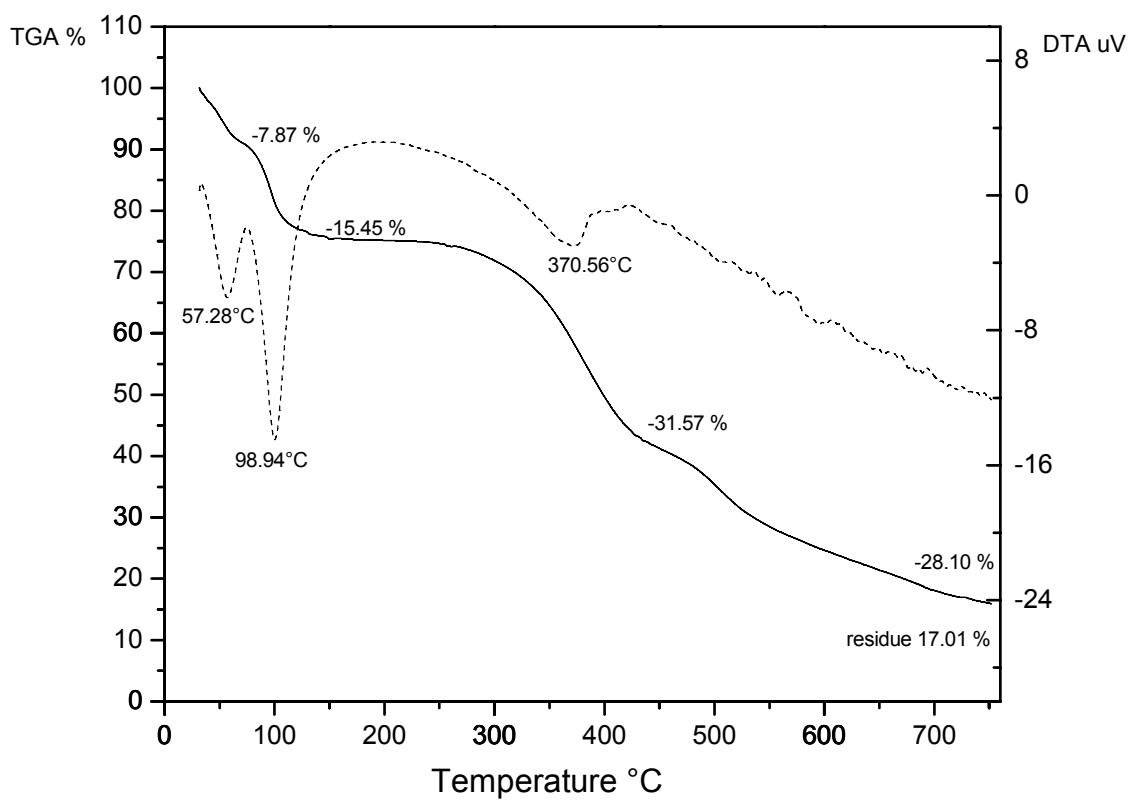

**Figure S2.** TGA and DTA curves for NiB<sub>2</sub>Bipy·10H<sub>2</sub>O complex.

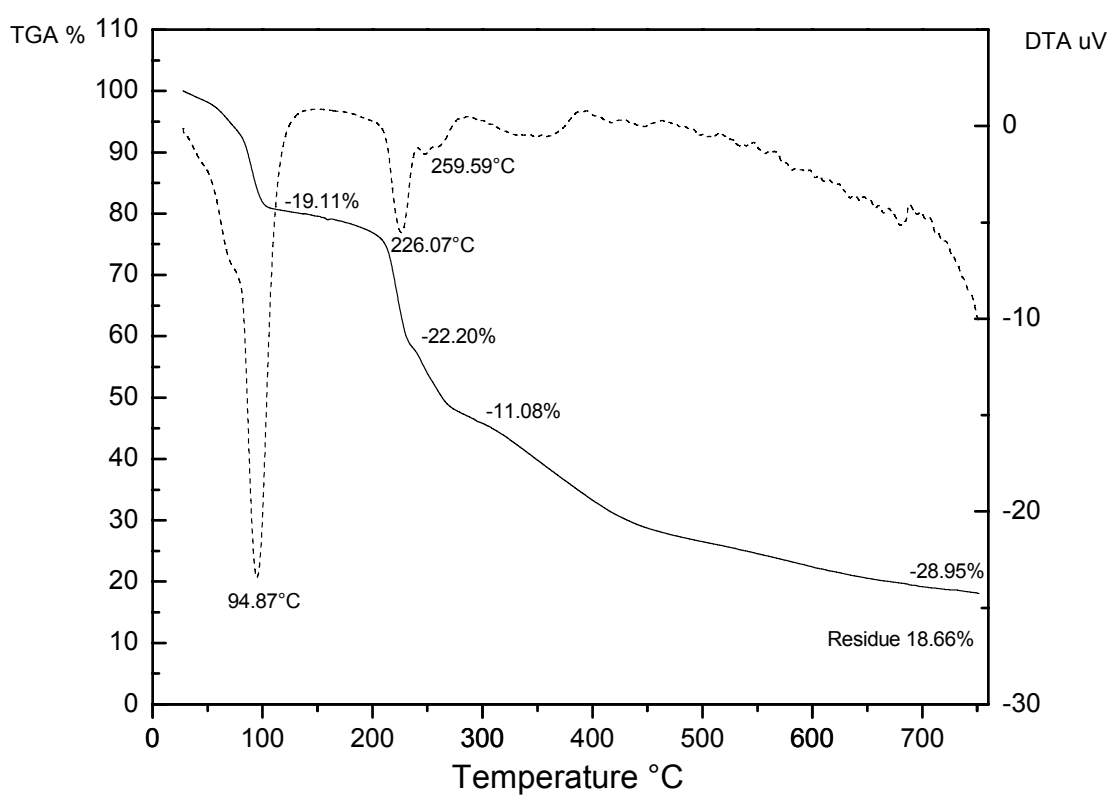

**Figure S3.** TGA and DTA curves for ZnB<sub>2</sub>Bipy·10H<sub>2</sub>O complex.
